# Supplementary material for: Molecular Beam Epitaxy of Twin-Free Bi2Se3 and Sb2Te3 on In2Se3/InP(111)B Virtual Substrates
Source: MDPI journal article supplement (doi:10.3390/cryst13040677), 2023-04-14
Supplement: s1 [file s1]

Archive with 1 entries (1 files):
- crystals-2320526-supplementary.pdf
