# Supplementary material for: Molecular Beam Epitaxy of Twin-Free Bi2Se3 and Sb2Te3 on In2Se3/InP(111)B Virtual Substrates
Source: MDPI journal article supplement (doi:10.3390/cryst13040677), 2023-04-14
Supplement: s1 [file s1 › crystals-2320526-supplementary.pdf]

# **Molecular Beam Epitaxy of Twin-Free Bi<sub>2</sub>Se<sub>3</sub> and Sb<sub>2</sub>Te<sub>3</sub> on In<sub>2</sub>Se<sub>3</sub>/InP(111)B Virtual Substrates**

<sup>1</sup> *Department of Chemistry, The City College of New York, New York, NY  
10031, USA; kwickramasinghe@ccny.cuny.edu (K.S.W.);  
cforrester@ccny.cuny.edu (C.F.)*

<sup>2</sup> *Chemistry Program, CUNY Graduate Center, New York, NY 10016, USA*

\* *Correspondence: mtamargo@ccny.cuny.edu*

**Supplementary Information**

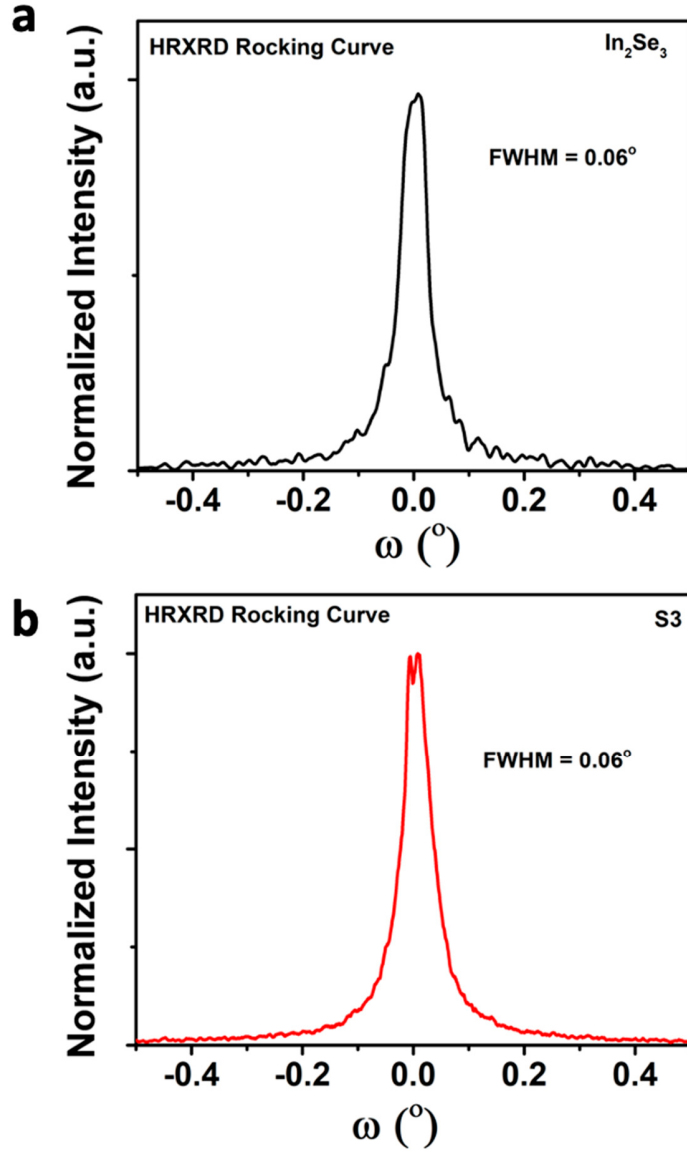

Supplementary Figure S1. High resolution X-ray diffraction rocking curve (RC) of (006) plane of: (a) 6 nm thick In<sub>2</sub>Se<sub>3</sub> layer on InP(111)B substrate (i.e., In<sub>2</sub>Se<sub>3</sub> virtual substrate) with a full width at half maximum (FWHM) of 0.06° and (b) 18 nm thick Bi<sub>2</sub>Se<sub>3</sub> layer (sample S3) grown on an In<sub>2</sub>Se<sub>3</sub> virtual substrate with a FWHM of 0.06°. Bragg reflection angle ( $2\theta$ ) of (006) In<sub>2</sub>Se<sub>3</sub> and (006) Bi<sub>2</sub>Se<sub>3</sub> are 18.863° and 18.559°, respectively.

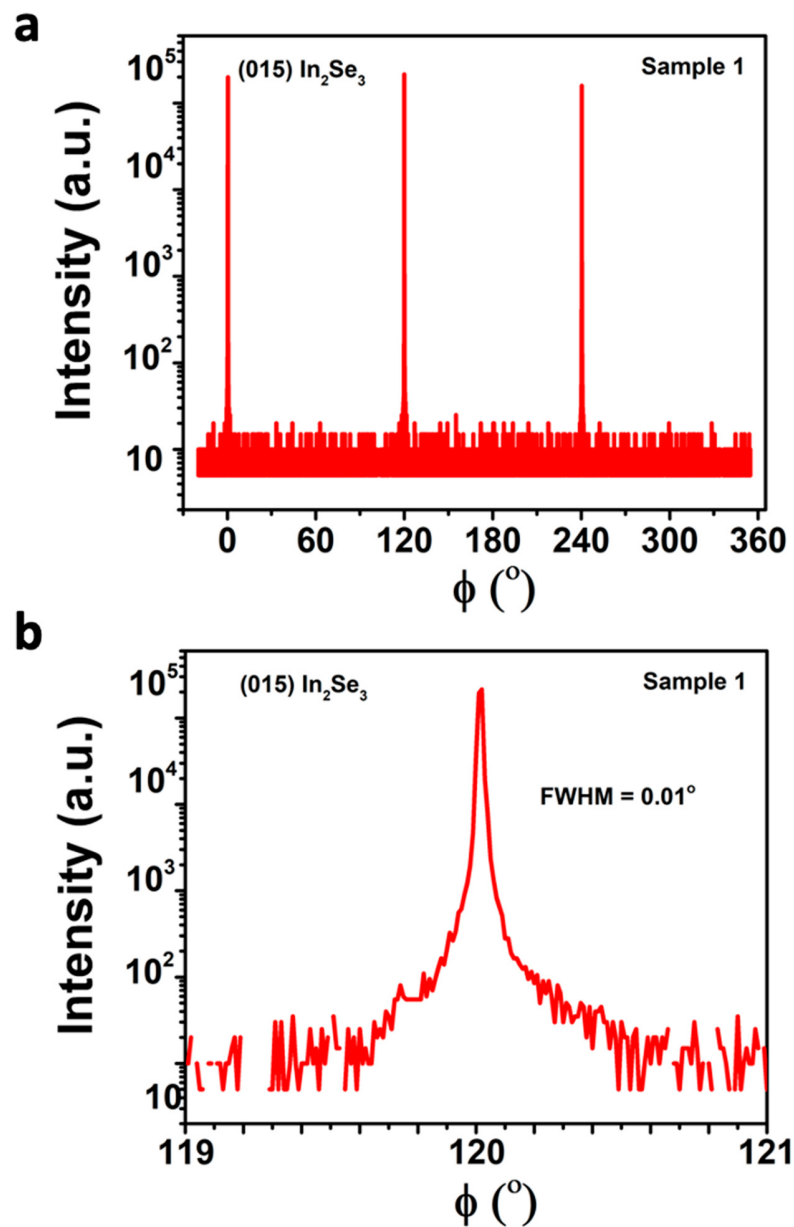

Supplementary Figure S2. (a)  $\phi$  scan of (015) plane of the un-twinned  $\text{In}_2\text{Se}_3$  Sample 1. (b) Expanded view of the peak at  $120^\circ$  shown in (a) with a FWHM of  $0.01^\circ$ .

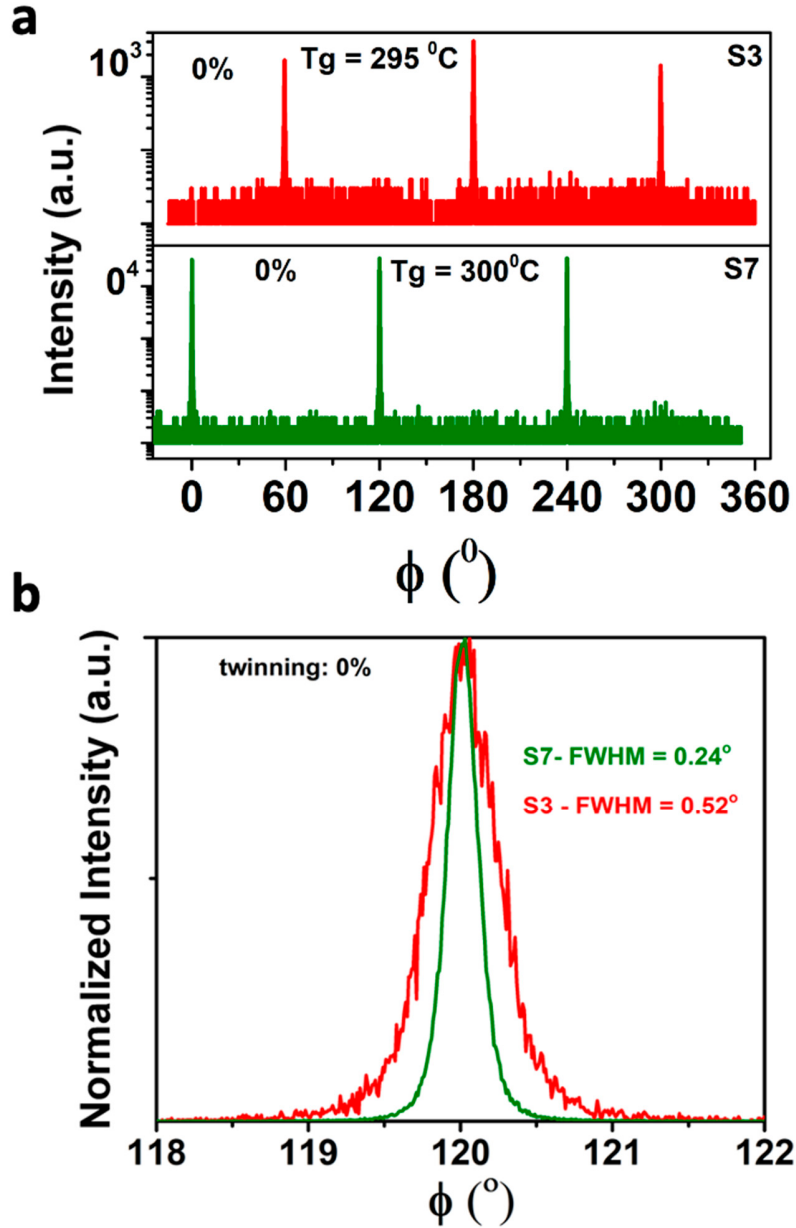

SUPPLEMENTARY FIG. 3. (a)  $\phi$  scans of (015) plane of the fully twin suppressed  $\text{Bi}_2\text{Se}_3$  samples S3 (18 nm thick) and S7 (64 nm thick). (b) Expanded view of the middle peak of the triplet shown in (a). The middle peak of S3 shown in (b) is shifted  $-60^\circ$  to align with the middle peak of S7 for the convenience of comparison.
